# Supplementary material
Source: publisher figshare collection journal article supplement (https://acs.figshare.com/ndownloader/files/10990931)
Supplement: Supplementary file 1 [file 10990931]

# Supporting Information

## Localized States Dependent Electroluminescence from ZnO/ZnS Core-Shell Nanowires-GaN Heterojunction

Ruxue Li,<sup>†</sup> Zhipeng Wei,<sup>†,\*</sup> Xuan Fang,<sup>†</sup> Yanbin Wang,<sup>†</sup> Yongfeng Li,<sup>‡</sup> Dengkui Wang,<sup>†</sup> Jilong Tang,<sup>†</sup> Dan Fang,<sup>†</sup> Xueying Chu,<sup>†</sup> Bin Yao,<sup>‡</sup> Rui Chen,<sup>§,\*</sup> and Xiaohua Wang<sup>†</sup>

<sup>†</sup> State Key Laboratory of High Power Semiconductor Lasers, School of Science, Changchun University of Science and Technology, 7089 Wei-Xing Road, Changchun 130022, P. R. China

<sup>‡</sup> Key Laboratory of Physics and Technology for Advanced Batteries (Ministry of Education), College of Physics, Jilin University, Changchun 130012, P. R. China

<sup>§</sup> Department of Electrical and Electronic Engineering, Southern University of Science and Technology, Shenzhen, Guangdong 518055, P. R. China

### Corresponding Author

\* Zhipeng Wei, Email: [zpweicust@126.com](mailto:zpweicust@126.com)

\* Rui Chen, Email: [chen.r@sustc.edu.cn](mailto:chen.r@sustc.edu.cn)

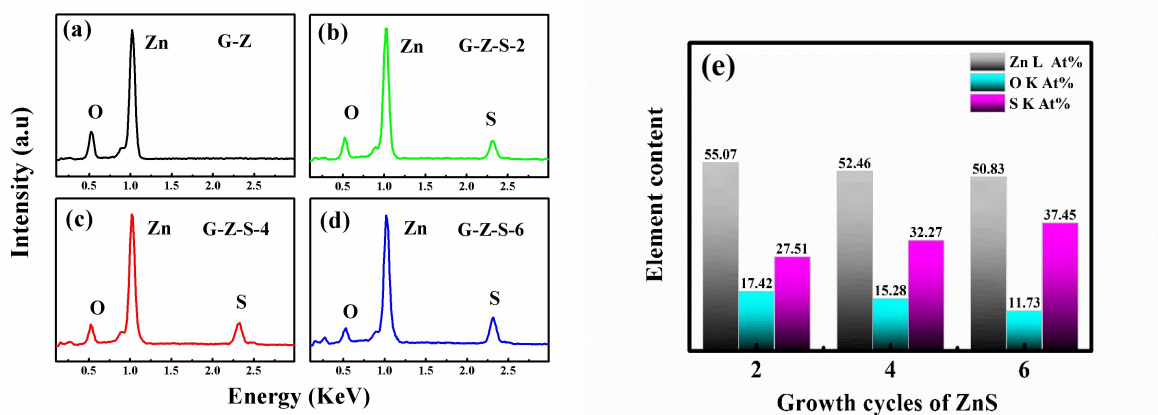

**Figure S1.** (a-d) EDS results of G-Z, G-Z-S-2, G-Z-S-4 and G-Z-S-6 samples. (e) Evolution of the element content of the Zn and S.

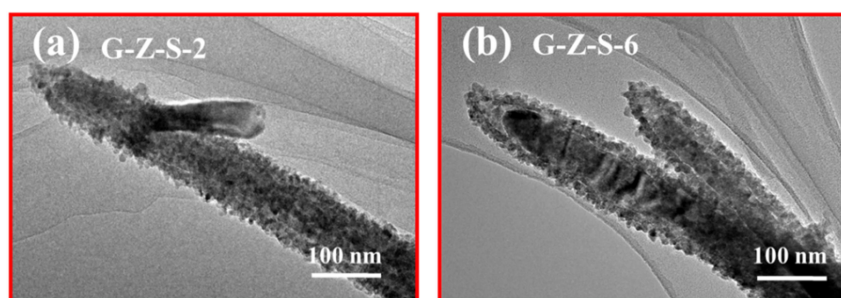

**Figure S2.** TEM images of individual NWs of (a) G-Z-S-2 sample, (b) G-Z-S-6 sample.

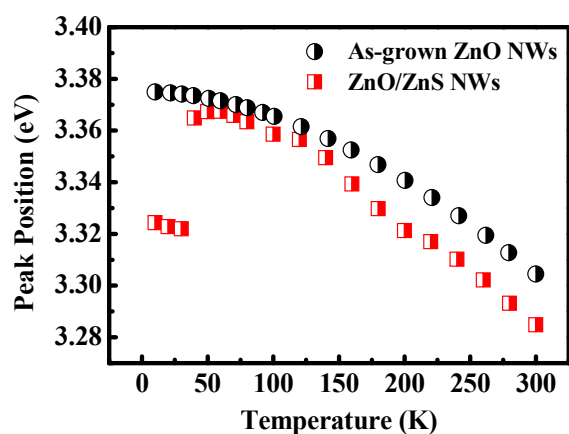

**Figure S3.** Temperature-dependent peak position of as-grown ZnO NWs and ZnO/ZnS NWs.

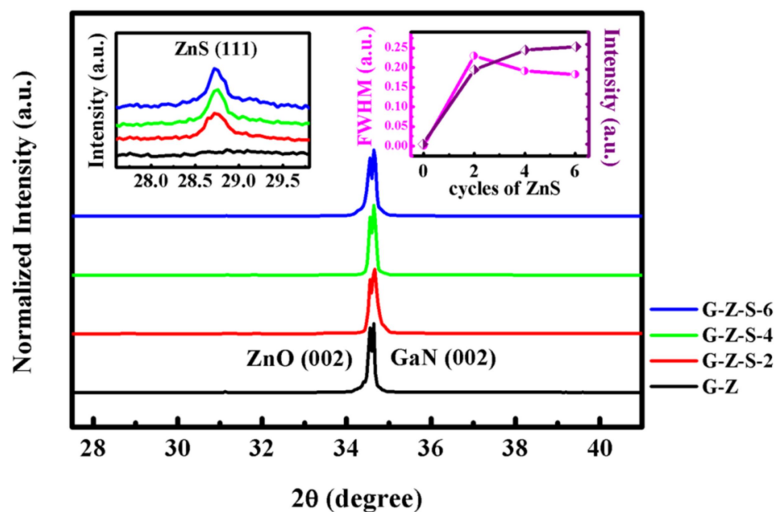

**Figure S4.** XRD patterns of G-Z, G-Z-S-2, G-Z-S-4 and G-Z-S-6 samples. The insert on left is the close-up picture of ZnS (111) along 28.5°. The right insert is the intensity and FWHM of the ZnS (111) with different samples.

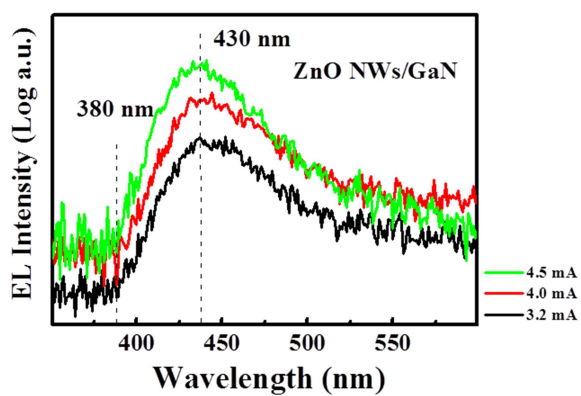

**Figure S5.** The RT EL spectra of the G-Z sample.
